# Supplementary material for: Effects of a high-prebiotic diet versus probiotic supplements versus synbiotics on adult mental health: The “Gut Feelings” randomised controlled trial
Source: PubMed Central journal article supplement (PMC9940791; doi:10.3389/fnins.2022.1097278), 2023-02-06

**Supplementary Figure 2.** Total prebiotic fibre intake at week 20 follow-up, as per purpose-built dietary screener. BL = week 0; W8 = week 8; W20 = week 20.

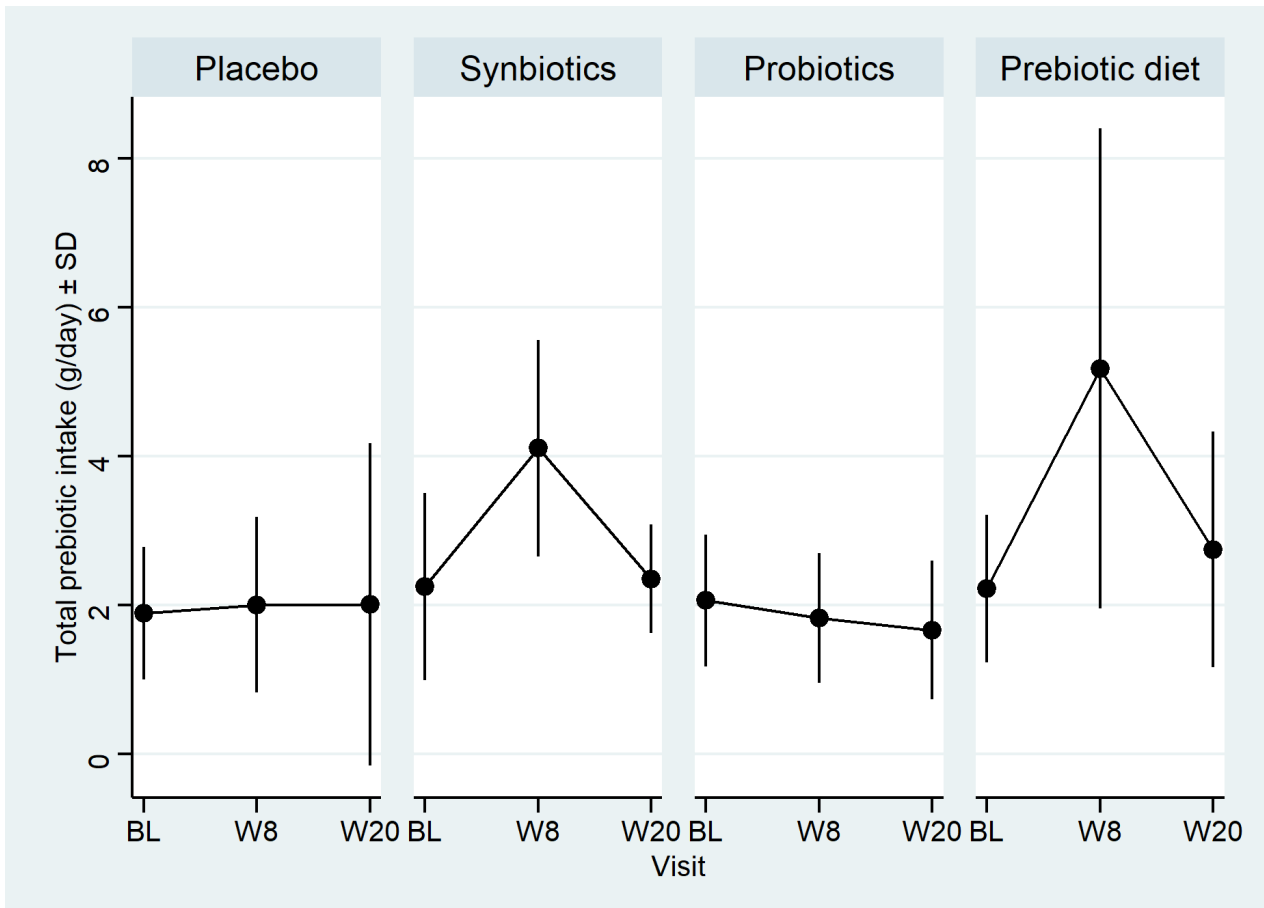

Supplement: Image_2.pdf [file Image_2.pdf]
