# Supplementary material for: Effects of a high-prebiotic diet versus probiotic supplements versus synbiotics on adult mental health: The “Gut Feelings” randomised controlled trial
Source: PubMed Central journal article supplement (PMC9940791; doi:10.3389/fnins.2022.1097278), 2023-02-06

**Supplementary Figure 3.** Gastrointestinal symptoms on Rome-IV Diagnostic Questionnaire for (A) Item 40, (B) Item 49, (C) Item 52, (D) Item 59, (E) Item 61, and (F) Item 65.

**A**

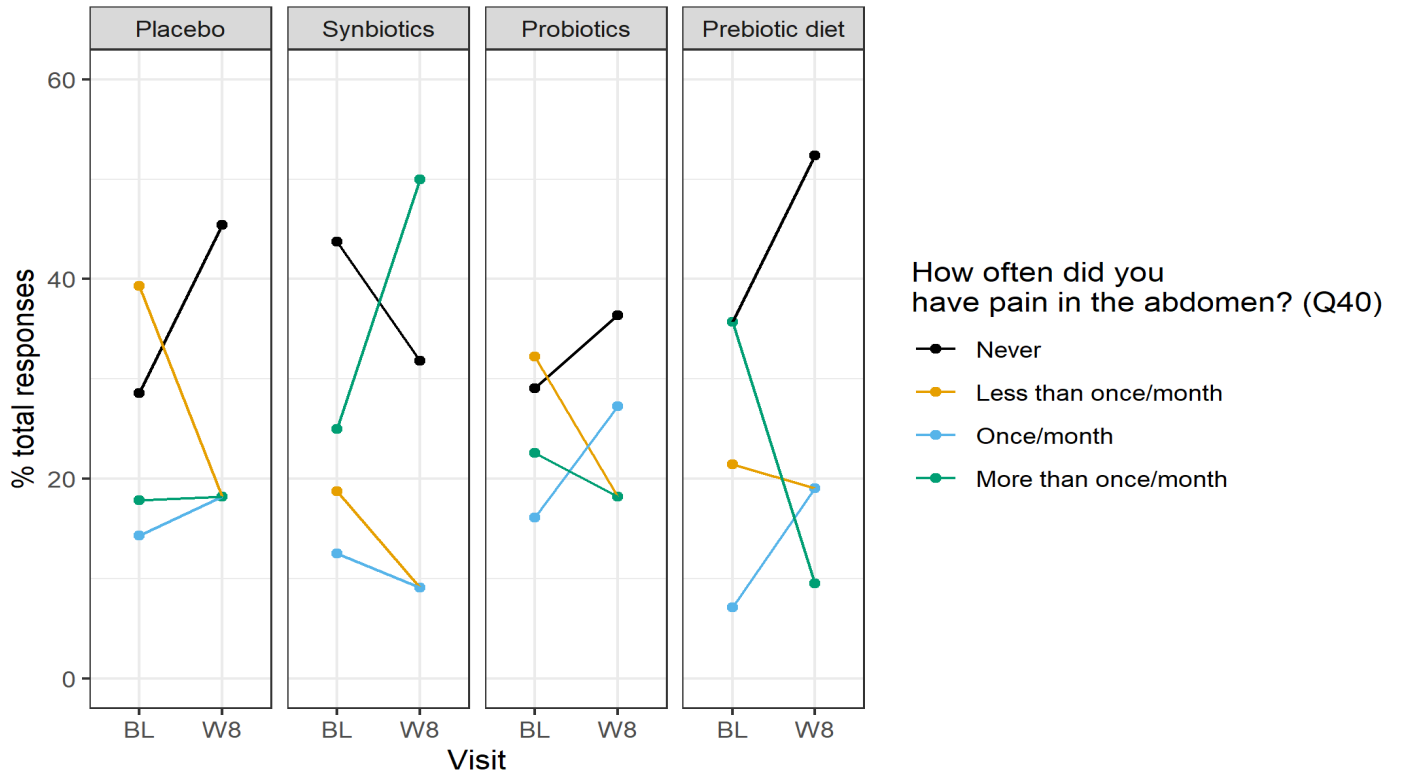

**B**

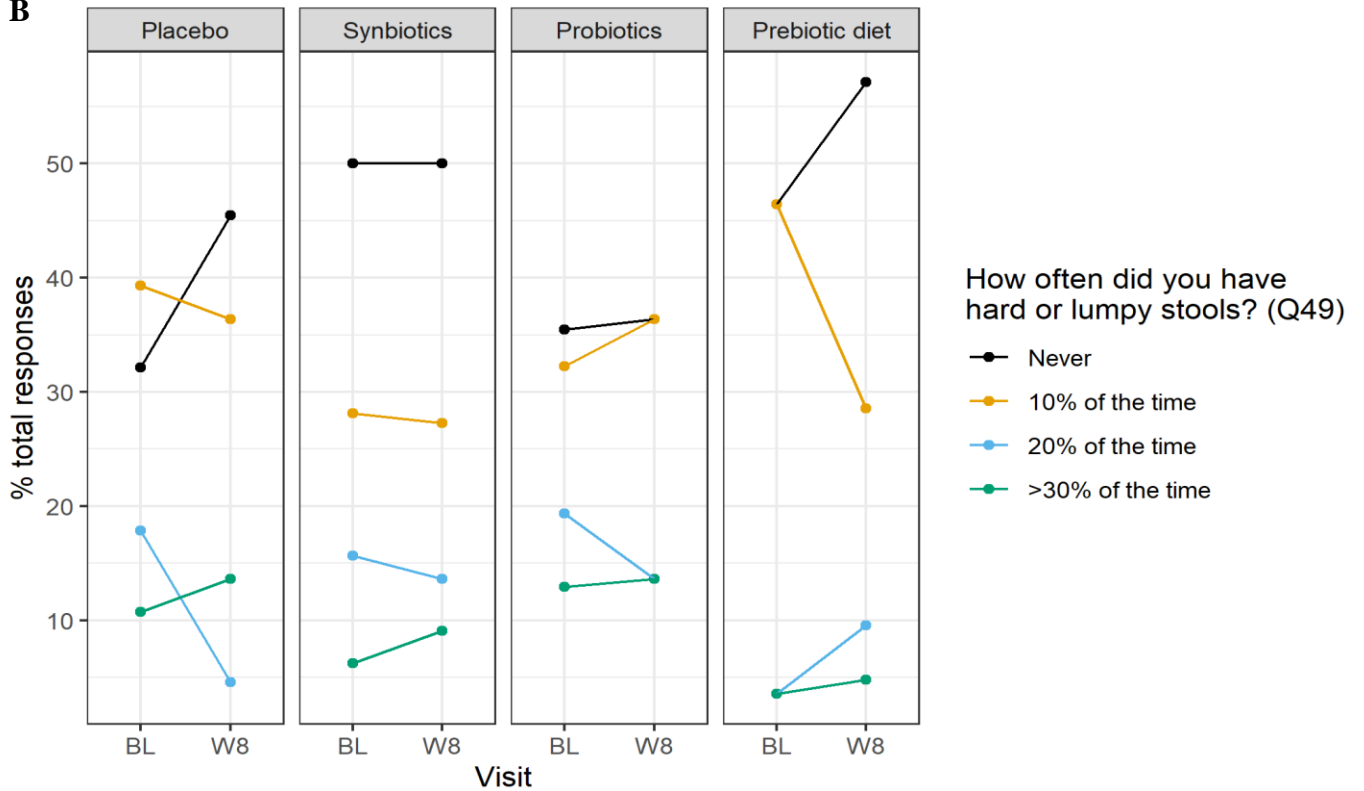

C

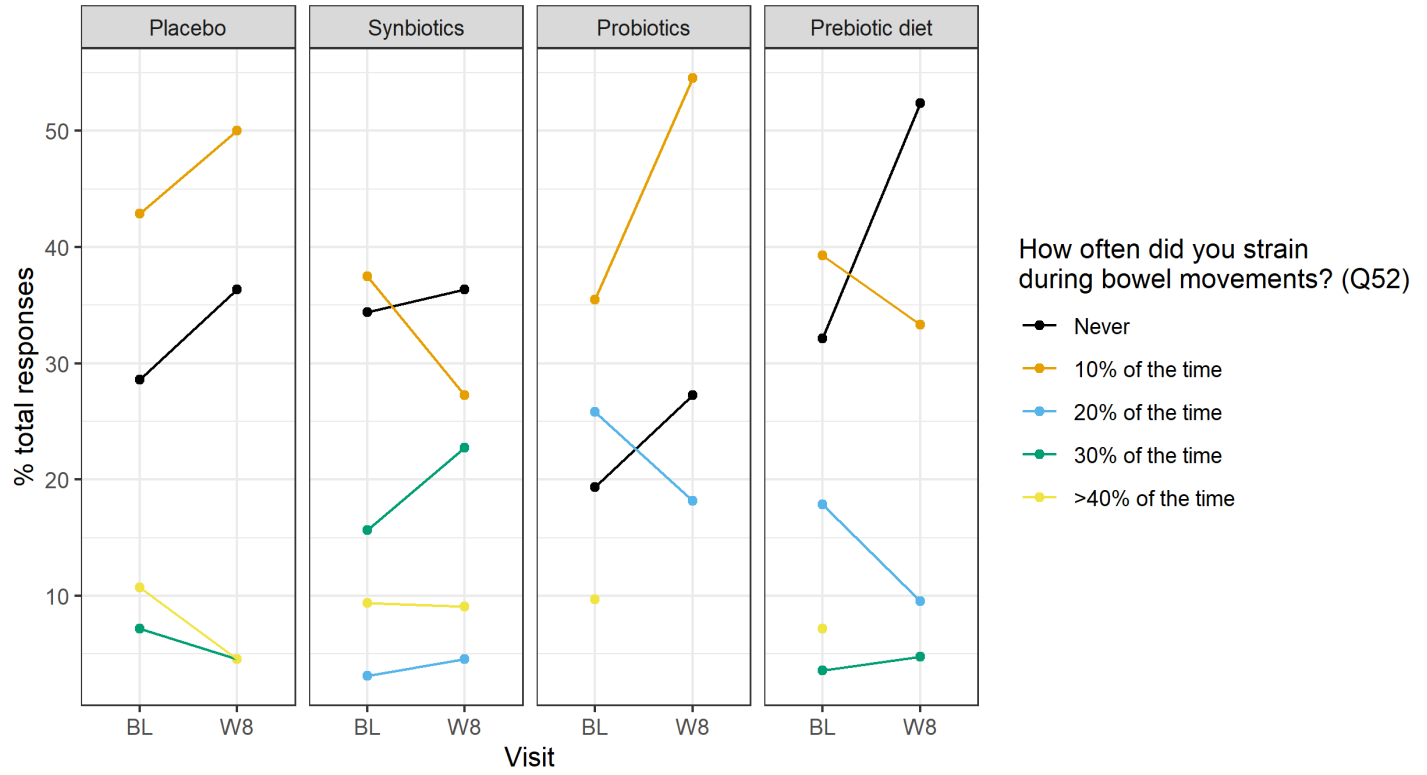

D

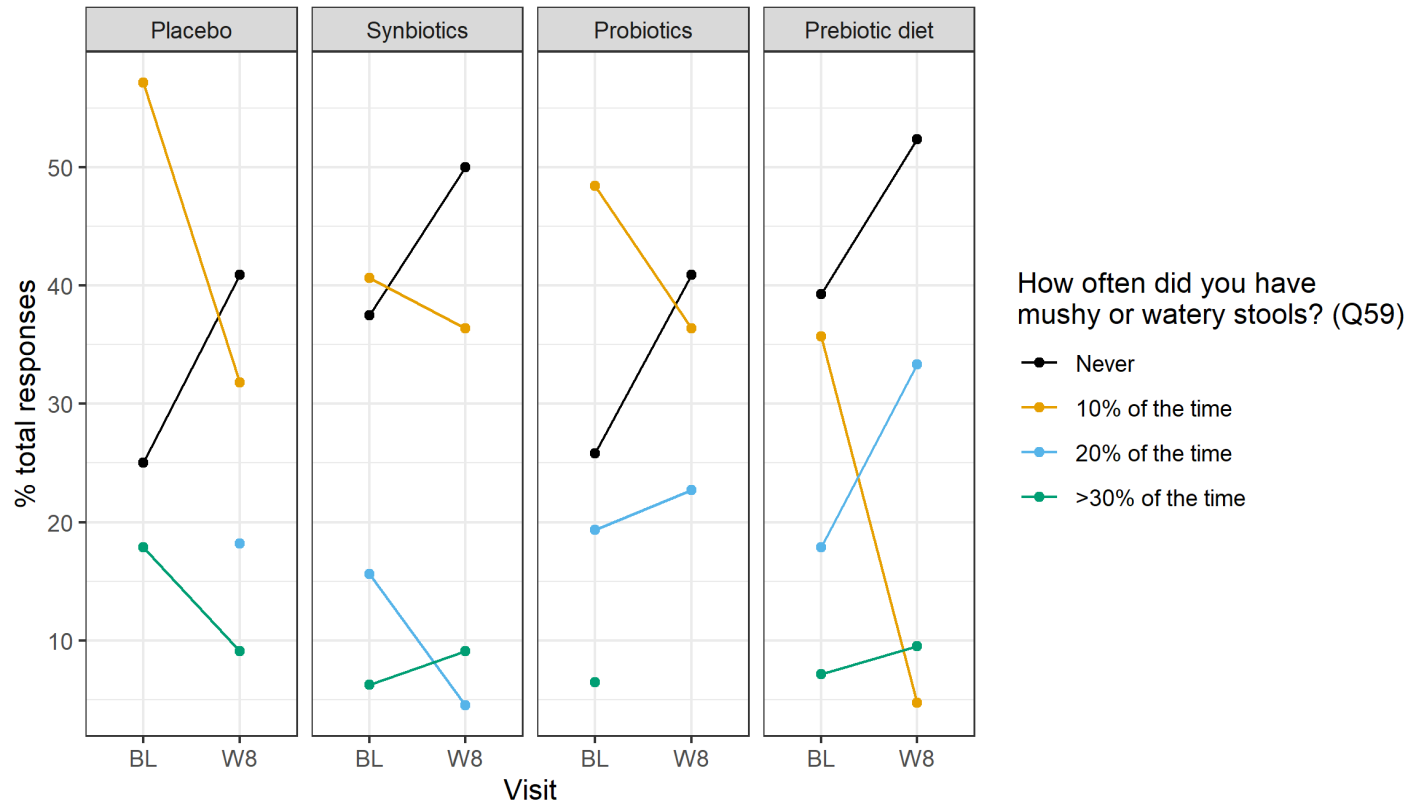

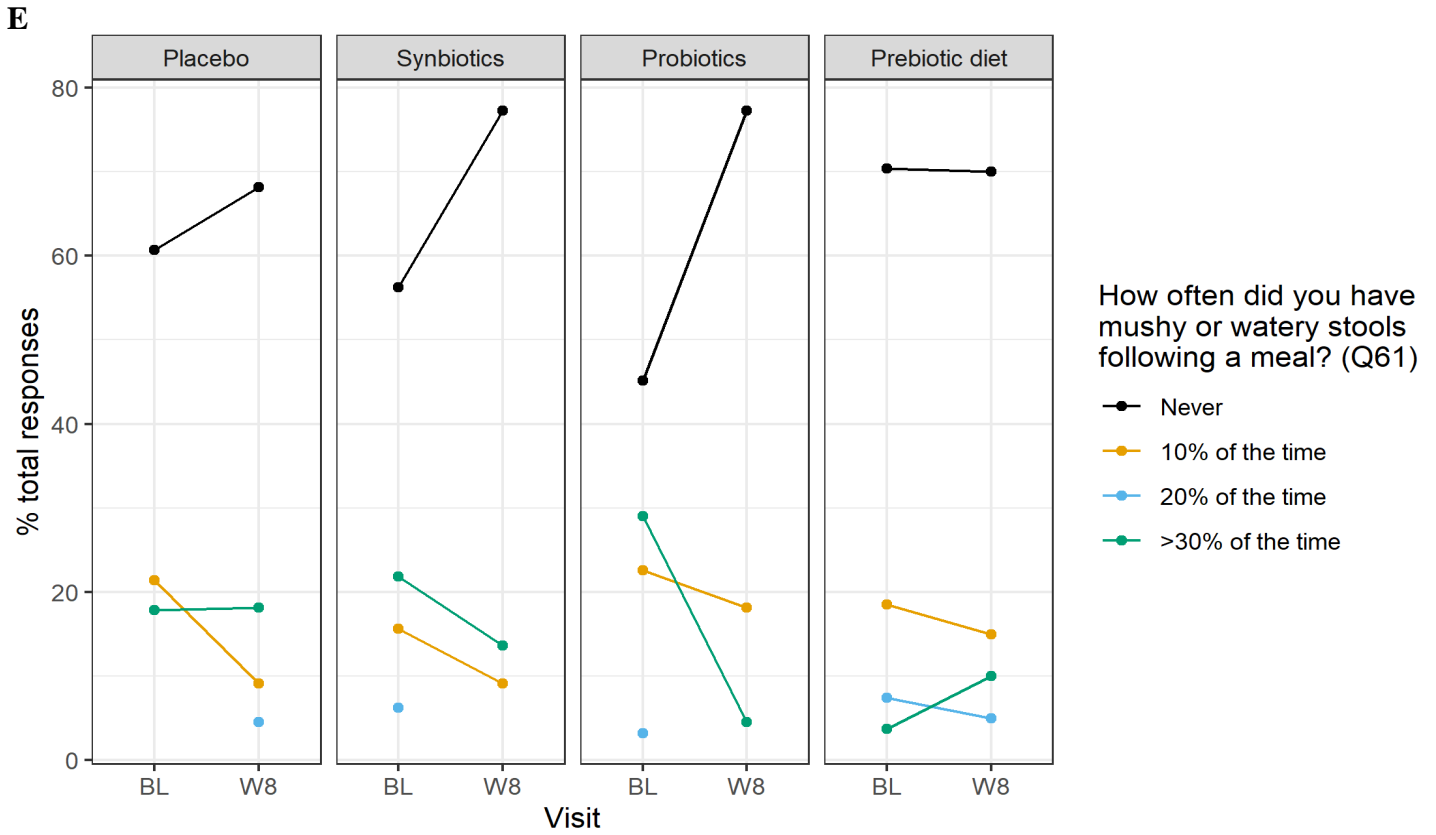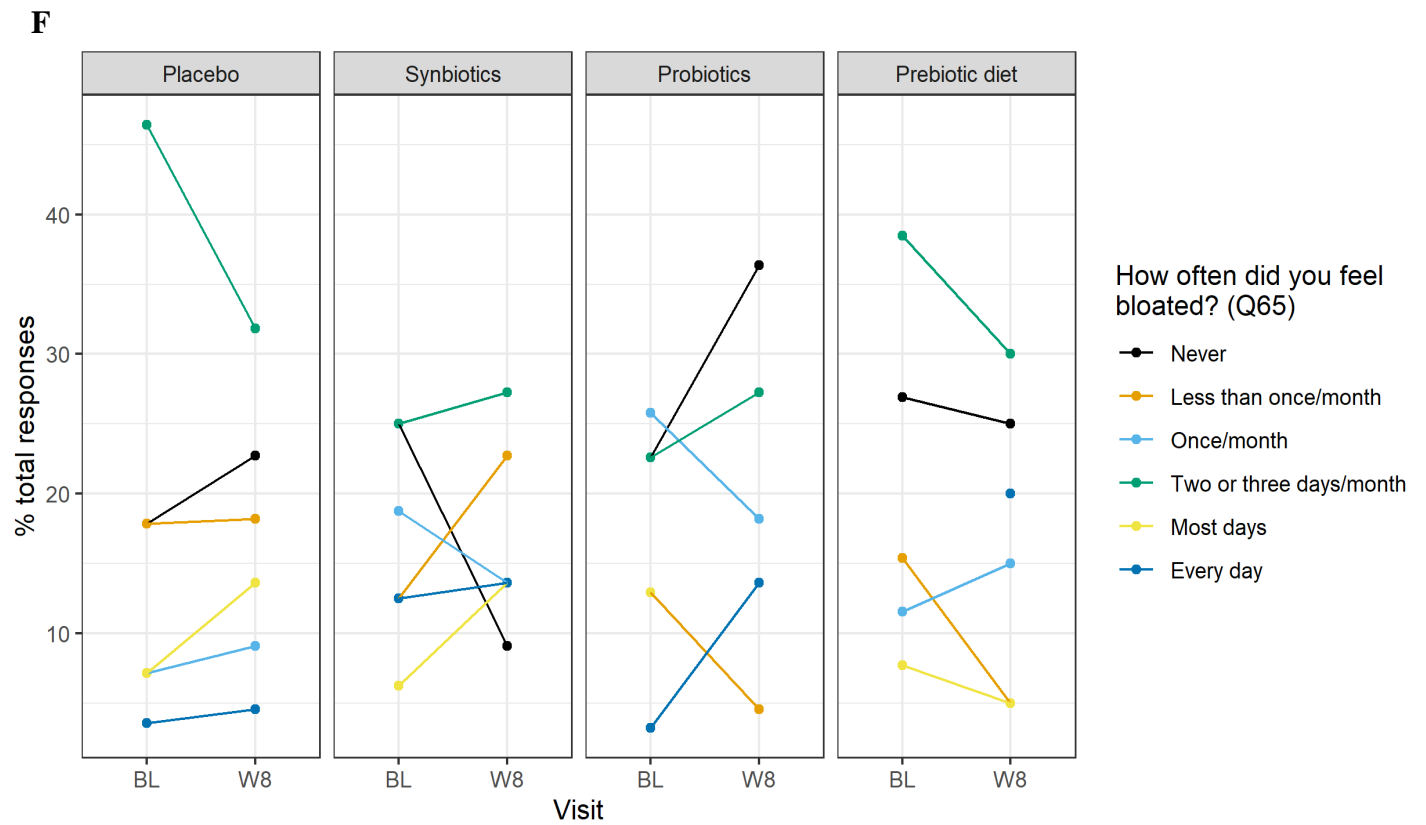

Supplement: Image_3.pdf [file Image_3.pdf]
