# Supplementary material for: Effects of a high-prebiotic diet versus probiotic supplements versus synbiotics on adult mental health: The “Gut Feelings” randomised controlled trial
Source: PubMed Central journal article supplement (PMC9940791; doi:10.3389/fnins.2022.1097278), 2023-02-06
Supplement: Table_1.pdf [file Table_1.pdf]

**Supplementary Table 1.** High-prebiotic diet: List of prebiotic-rich foods, serves per day, and serving sizes

| Food group        | Serves       | Food item*                                               | Serving size**          |
|-------------------|--------------|----------------------------------------------------------|-------------------------|
| <i>Vegetables</i> | <i>2/day</i> | Artichoke, globe head                                    | ½ small                 |
|                   |              | Artichoke, Jerusalem                                     | 1 piece, 50 g           |
|                   |              | Asparagus                                                | 4 spears                |
|                   |              | Beetroot                                                 | 1 baby, 2 rings         |
|                   |              | Broccoli                                                 | ½ cup                   |
|                   |              | Cabbage, raw                                             | ½ cup                   |
|                   |              | Chicory root, raw                                        | ½ cup                   |
|                   |              | Dandelion greens                                         | ½ cup                   |
|                   |              | Fennel, bulb                                             | ½ cup                   |
|                   |              | Garlic                                                   | 1 clove                 |
|                   |              | Kale, raw                                                | 1 packed cup            |
|                   |              | Parsnip or kohlrabi                                      | ½ cup                   |
|                   |              | Onion, leek, shallot, or spring onion                    | ¼ cup                   |
|                   |              | Peas, green or snow                                      | ½ cup                   |
|                   |              | Sweetcorn                                                | ½ cup kernels, or 1 cob |
| <i>Legumes</i>    | <i>1/day</i> | Beans, baked                                             | ½ cup                   |
|                   |              | Beans, red kidney or borlotti or lima or haricot, cooked | ½ cup                   |
|                   |              | Beans, mixed, cooked                                     | ½ cup                   |
|                   |              | Beans, soy or edamame, cooked                            | ½ cup                   |
|                   |              | Chickpeas, including hummus, cooked                      | ½ cup                   |
|                   |              | Falafel                                                  | 4 small balls           |
|                   |              | Lentil or bean burger patties                            | ½ patty                 |
|                   |              | Lentils, cooked                                          | ½ cup                   |
|                   |              | Split peas, cooked                                       | ½ cup                   |
| <i>Fruit</i>      | <i>1/day</i> | Blueberries                                              | ½ cup                   |
|                   |              | Cherries                                                 | 1/3 cup                 |
|                   |              | Currant, red                                             | ½ cup                   |
|                   |              | Dried fruit, i.e., figs, dates                           | 2 figs, or 4 dates      |
|                   |              | Grapefruit                                               | ½ fruit                 |
|                   |              | Melon: watermelon or honeydew                            | 1 thick slice           |
|                   |              | Nectarine                                                | 1 med                   |
|                   |              | Peach, white                                             | 1 med                   |
|                   |              | Persimmon                                                | 1 med                   |
|                   |              | Pomegranate                                              | ½ small                 |
|                   |              | Rambutan                                                 | 4 pieces                |
|                   |              | Tamarillo                                                | 2 tamarillos            |
|                   |              | Banana                                                   | 1 small                 |
| <i>Grains</i>     | <i>2/day</i> | Biscuit, rye crispbread                                  | 1 piece                 |

|             |                                                  |                              |
|-------------|--------------------------------------------------|------------------------------|
|             | Bread, wholewheat or rye                         | 1 slice, ½ roll              |
|             | Cereal, All-Bran                                 | ½ cup                        |
|             | Cereal, oats                                     | ½ cup dry, 1 cup cooked      |
|             | Cereal, wholegrain, e.g., Sustain, flaked barley | 1 cup                        |
|             | Cereal, Weet-bix                                 | 1 cup, or 3 biscuits         |
|             | Corn thins, plain                                | 2 pieces                     |
|             | Couscous, cooked                                 | 1 cup                        |
|             | Muesli                                           | 1/3 cup                      |
|             | Muesli bar, plain with dried fruit               | 1 bar                        |
|             | Pasta, gnocchi, or wheat noodles, cooked         | 1 cup                        |
|             | Wheat berries, barley, or rye, raw               | 1/3 cup                      |
| <i>Nuts</i> | <i>1/day</i>                                     |                              |
|             | Cashews or almonds                               | 20 nuts or 1 Tbsp nut butter |
|             | Pistachios                                       | 30 nuts or 1 Tbsp nut butter |
|             | Walnuts                                          | 15 nuts or 1 Tbsp nut butter |

\* Food list adapted from Monash University High Fibre High-Prebiotic Diet, (Biesiekierski et al., 2011), (Muir et al., 2009), and (Muir et al., 2007);

\*\* Serving sizes adapted from CNAQ food frequency questionnaire and Monash University FODMAP Diet mobile application.

## References

- Biesiekierski, J., Rosella, O., Rose, R., Liels, K., Barrett, J., Shepherd, S., et al. (2011). Quantification of fructans, galacto-oligosaccharides and other short-chain carbohydrates in processed grains and cereals. *Journal of Human Nutrition and Dietetics* 24(2), 154-176.
- Muir, J.G., Rose, R., Rosella, O., Liels, K., Barrett, J.S., Shepherd, S.J., et al. (2009). Measurement of short-chain carbohydrates in common Australian vegetables and fruits by high-performance liquid chromatography (HPLC). *Journal of Agricultural and Food Chemistry* 57(2), 554-565.
- Muir, J.G., Shepherd, S.J., Rosella, O., Rose, R., Barrett, J.S., and Gibson, P.R. (2007). Fructan and free fructose content of common Australian vegetables and fruit. *Journal of Agricultural and Food Chemistry* 55(16), 6619-6627.
