# Supplementary material for: Effects of a high-prebiotic diet versus probiotic supplements versus synbiotics on adult mental health: The “Gut Feelings” randomised controlled trial
Source: PubMed Central journal article supplement (PMC9940791; doi:10.3389/fnins.2022.1097278), 2023-02-06
Supplement: Table_2.pdf [file Table_2.pdf]

**Supplementary Table 2.** Adherence to prebiotic intervention: Estimated prebiotic fibre intake at each visit

| Visit               | Estimated total prebiotic intake* (g/day), mean (SD) |                                 |                                       |
|---------------------|------------------------------------------------------|---------------------------------|---------------------------------------|
|                     | Dietary intervention groups                          | Non-dietary intervention groups | <i>P</i> (between group difference)** |
| Baseline            | 2.23 (1.13)                                          | 1.98 (0.888)                    | 0.20                                  |
| Week 2              | 4.62 (2.09)                                          | 1.96 (1.03)                     | < 0.001                               |
| Week 4              | 4.72 (1.89)                                          | 1.92 (0.876)                    | < 0.001                               |
| Week 6              | 4.87 (2.20)                                          | 1.78 (0.815)                    | < 0.001                               |
| Week 8              | 4.63 (2.51)                                          | 1.90 (1.04)                     | < 0.001                               |
| Week 20 (follow-up) | 2.56 (1.25)                                          | 1.86 (1.74)                     | 0.10                                  |

\* Dietary prebiotic intake estimates calculated from the purpose-built dietary screener;

\*\* Welch two sample t-test.
