# Supplementary material for: Effects of a high-prebiotic diet versus probiotic supplements versus synbiotics on adult mental health: The “Gut Feelings” randomised controlled trial
Source: PubMed Central journal article supplement (PMC9940791; doi:10.3389/fnins.2022.1097278), 2023-02-06
Supplement: Table_3.pdf [file Table_3.pdf]

**Supplementary Table 3.** Assessment of capsule blinding success at week 8

| Participant's guess, n (%) |           |           |             |            |
|----------------------------|-----------|-----------|-------------|------------|
| Group                      | Probiotic | Placebo   | Do not know | Total      |
| Probiotic                  | 8 (8.5)   | 4 (4.3)   | 12 (12.8)   | 24 (25.5)  |
| Prebiotic diet*            | 4 (4.3)   | 7 (7.4)   | 11 (11.7)   | 22 (23.4)  |
| Synbiotic**                | 7 (7.4)   | 12 (12.8) | 4 (4.3)     | 23 (24.5)  |
| Placebo                    | 10 (10.6) | 9 (9.6)   | 6 (6.4)     | 25 (26.6)  |
| Total                      | 29 (30.9) | 32 (34.0) | 33 (35.1)   | 94 (100.0) |

\* Placebo capsule administered;

\*\* Probiotic capsule administered.
