# Supplementary material for: Effects of a high-prebiotic diet versus probiotic supplements versus synbiotics on adult mental health: The “Gut Feelings” randomised controlled trial
Source: PubMed Central journal article supplement (PMC9940791; doi:10.3389/fnins.2022.1097278), 2023-02-06
Supplement: Table_4.pdf [file Table_4.pdf]

**Supplementary Table 4.** Effect of treatments on secondary outcomes with multiply imputed missing week 8 data

| Outcome                             | Treatment      | Mean difference at week 8 (95% CI; <i>p</i> )* |
|-------------------------------------|----------------|------------------------------------------------|
| <i>PSS total</i>                    | Placebo        | Reference                                      |
|                                     | Prebiotic diet | -3.27 (-5.83, -0.712; <i>p</i> = 0.013)        |
|                                     | Probiotic      | -1.77 (-4.35, 0.797; <i>p</i> = 0.17)          |
|                                     | Synbiotic      | -1.98 (-4.64, 0.686; <i>p</i> = 0.14)          |
| <i>WHO-5 total</i> <sup>2</sup>     | Placebo        | Reference                                      |
|                                     | Prebiotic diet | 1.05 (-1.09, 3.18; <i>p</i> = 0.33)            |
|                                     | Probiotic      | 0.150 (-2.00, 2.30; <i>p</i> = 0.89)           |
|                                     | Synbiotic      | -0.500 (-2.62, 1.62; <i>p</i> = 0.64)          |
| <i>LSEQ average</i> <sup>2</sup>    | Placebo        | Reference                                      |
|                                     | Prebiotic diet | 0.771 (0.133, 1.41; <i>p</i> = 0.018)          |
|                                     | Probiotic      | 0.215 (-0.429, 0.859; <i>p</i> = 0.51)         |
|                                     | Synbiotic      | 0.144 (-0.464, 0.752; <i>p</i> = 0.64)         |
| <i>Outcome</i> <sup>1</sup>         | Treatment      | OR (95% CI; <i>p</i> )*                        |
| <i>BAI total</i>                    | Placebo        | Reference                                      |
|                                     | Prebiotic diet | 0.273 (0.098, 0.763; <i>p</i> = 0.014)         |
|                                     | Probiotic      | 0.387 (0.141, 1.07; <i>p</i> = 0.066)          |
|                                     | Synbiotic      | 0.538 (0.191, 1.51; <i>p</i> = 0.24)           |
| <i>BDI total</i>                    | Placebo        | Reference                                      |
|                                     | Prebiotic diet | 0.525 (0.174, 1.59; <i>p</i> = 0.25)           |
|                                     | Probiotic      | 0.899 (0.310, 2.61; <i>p</i> = 0.84)           |
|                                     | Synbiotic      | 1.20 (0.405, 3.56; <i>p</i> = 0.74)            |
| <i>SF-36 fatigue</i> <sup>2</sup>   | Placebo        | Reference                                      |
|                                     | Prebiotic diet | 1.91 (0.699, 5.73; <i>p</i> = 0.19)            |
|                                     | Probiotic      | 1.53 (0.572, 4.11; <i>p</i> = 0.39)            |
|                                     | Synbiotic      | 1.20 (0.442, 3.29; <i>p</i> = 0.71)            |
| <i>SF-36 wellbeing</i> <sup>2</sup> | Placebo        | Reference                                      |
|                                     | Prebiotic diet | 1.79 (0.645, 4.99; <i>p</i> = 0.26)            |
|                                     | Probiotic      | 3.27 (1.22, 8.79; <i>p</i> = 0.019)            |
|                                     | Synbiotic      | 1.25 (0.438, 3.55; <i>p</i> = 0.68)            |

\* Model estimates adjusted for baseline outcome score;

<sup>1</sup> Outcomes modelled as ordinal – odds ratios represent fold-change in odds of poorer outcomes (e.g., more severe anxiety) for BAI and BDI scales, and odds of better outcomes for SF-36 fatigue and wellbeing subscales; <sup>2</sup> Higher values indicate better outcomes.

OR = odds ratio; POMS 2-SF = Profile of Mood States 2 – Short Form; BAI = Beck Anxiety Inventory; BDI = Beck Depression Inventory-II; PSS = Perceived Stress Scale; SF-36 = Short Form 36.
