# Supplementary material for: Effects of a high-prebiotic diet versus probiotic supplements versus synbiotics on adult mental health: The “Gut Feelings” randomised controlled trial
Source: PubMed Central journal article supplement (PMC9940791; doi:10.3389/fnins.2022.1097278), 2023-02-06
Supplement: Table_5.pdf [file Table_5.pdf]

**Supplementary Table 5.** Prebiotic fibre intake and dietary quality at baseline and week 8.

| Dietary outcome                | Baseline, mean (SD), n |                 | Week 8, mean (SD), n |                 | Mean difference at week 8 (95% CI; <i>p</i> ) <sup>1</sup> |
|--------------------------------|------------------------|-----------------|----------------------|-----------------|------------------------------------------------------------|
|                                | Diet-treated groups    | Non-diet groups | Diet-treated groups  | Non-diet groups |                                                            |
| Total oligosaccharides, g/day* | 6.46 (4.26), 60        | 5.65 (2.97), 59 | 8.62 (4.24), 45      | 4.54 (1.85), 49 | 3.25 (2.22, 4.28; <i>p</i> < 0.001)                        |
| Total resistant starch, g/day* | 5.05 (3.91), 60        | 4.02 (2.11), 59 | 6.83 (4.74), 45      | 3.59 (1.76), 49 | 2.15 (1.15, 3.16; <i>p</i> < 0.001)                        |
| Dietary quality score**        | 66.5 (10.9), 60        | 63.8 (12.3), 58 | 70.9 (9.52), 45      | 62.9 (12.6), 49 | 5.32 (1.57, 9.06; <i>p</i> = 0.006)                        |

\* Calculated from the Monash Comprehensive Nutrition Assessment Questionnaire;

\*\* Calculated from the purpose-built dietary screener;

<sup>1</sup> ANCOVA model estimates adjusted for baseline value.
