# Supplementary material for: Effects of a high-prebiotic diet versus probiotic supplements versus synbiotics on adult mental health: The “Gut Feelings” randomised controlled trial
Source: PubMed Central journal article supplement (PMC9940791; doi:10.3389/fnins.2022.1097278), 2023-02-06
Supplement: Table_6.pdf [file Table_6.pdf]

**Supplementary Table 6.** Gastrointestinal symptoms on Rome-IV Diagnostic Questionnaire.

| Rome-IV items (item number)                         | Treatment      | Odds ratio for greater disturbance (95% CI; <i>p</i> )* |
|-----------------------------------------------------|----------------|---------------------------------------------------------|
| <i>Abdominal pain (40)</i>                          | Placebo        | Reference                                               |
|                                                     | Prebiotic diet | 0.458 (0.135, 1.49; <i>p</i> = 0.20)                    |
|                                                     | Probiotic      | 1.28 (0.427, 3.86; <i>p</i> = 0.66)                     |
|                                                     | Synbiotic      | 3.10 (1.00, 9.99; <i>p</i> = 0.053)                     |
| <i>Hard or lumpy stools (49)</i>                    | Placebo        | Reference                                               |
|                                                     | Prebiotic diet | 1.07 (0.324, 3.52; <i>p</i> = 0.92)                     |
|                                                     | Probiotic      | 1.87 (0.608, 5.89; <i>p</i> = 0.28)                     |
|                                                     | Synbiotic      | 1.51 (0.469, 4.96; <i>p</i> = 0.49)                     |
| <i>Strain during bowel movements (52)</i>           | Placebo        | Reference                                               |
|                                                     | Prebiotic diet | 0.455 (0.132, 1.49; <i>p</i> = 0.20)                    |
|                                                     | Probiotic      | 1.27 (0.420, 3.85; <i>p</i> = 0.68)                     |
|                                                     | Synbiotic      | 2.27 (0.726, 7.25; <i>p</i> = 0.16)                     |
| <i>Mushy or watery stools (59)</i>                  | Placebo        | Reference                                               |
|                                                     | Prebiotic diet | 1.15 (0.361, 3.67; <i>p</i> = 0.81)                     |
|                                                     | Probiotic      | 0.761 (0.253, 2.28; <i>p</i> = 0.63)                    |
|                                                     | Synbiotic      | 0.739 (0.239, 2.27; <i>p</i> = 0.60)                    |
| <i>Mushy or watery stools following a meal (61)</i> | Placebo        | Reference                                               |
|                                                     | Prebiotic diet | 1.11 (0.296, 4.06; <i>p</i> = 0.88)                     |
|                                                     | Probiotic      | 0.350 (0.074, 1.44; <i>p</i> = 0.16)                    |
|                                                     | Synbiotic      | 0.513 (0.124, 1.98; <i>p</i> = 0.34)                    |
| <i>Bloating (65)</i>                                | Placebo        | Reference                                               |
|                                                     | Prebiotic diet | 1.98 (0.630, 6.33; <i>p</i> = 0.25)                     |
|                                                     | Probiotic      | 0.971 (0.331, 2.84; <i>p</i> = 0.96)                    |
|                                                     | Synbiotic      | 2.43 (0.821, 7.37; <i>p</i> = 0.11)                     |

\*From proportional odds model adjusted for baseline score.
